# Supplementary material
Source: Springer Nature journal article supplement (https://www.springermedizin.de/resource/supplementary/12939_2013_392_MOESM2_ESM.pdf/9551048)

A)

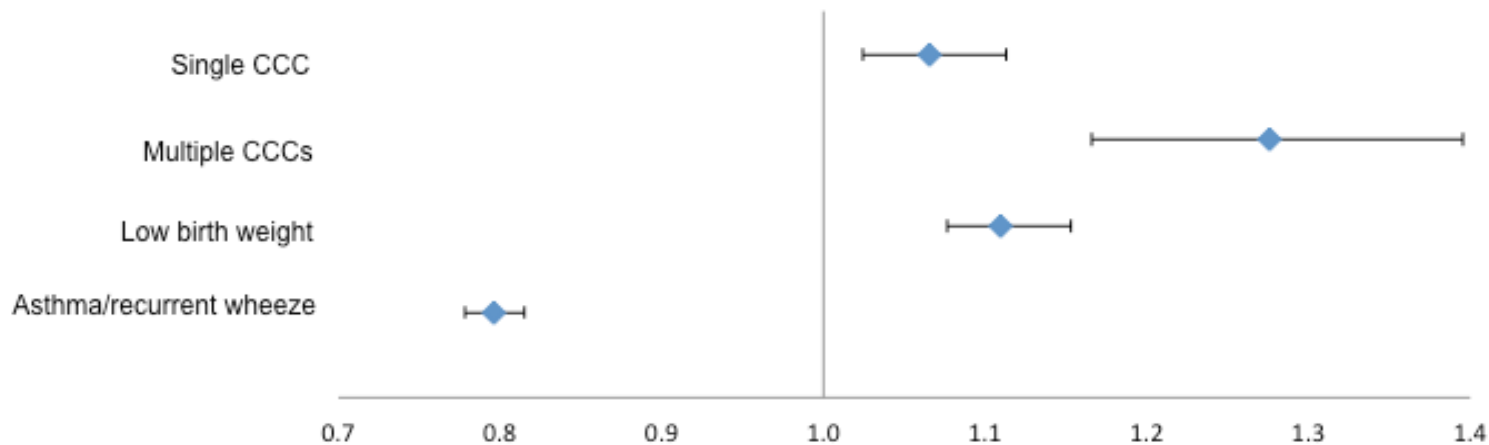

B)

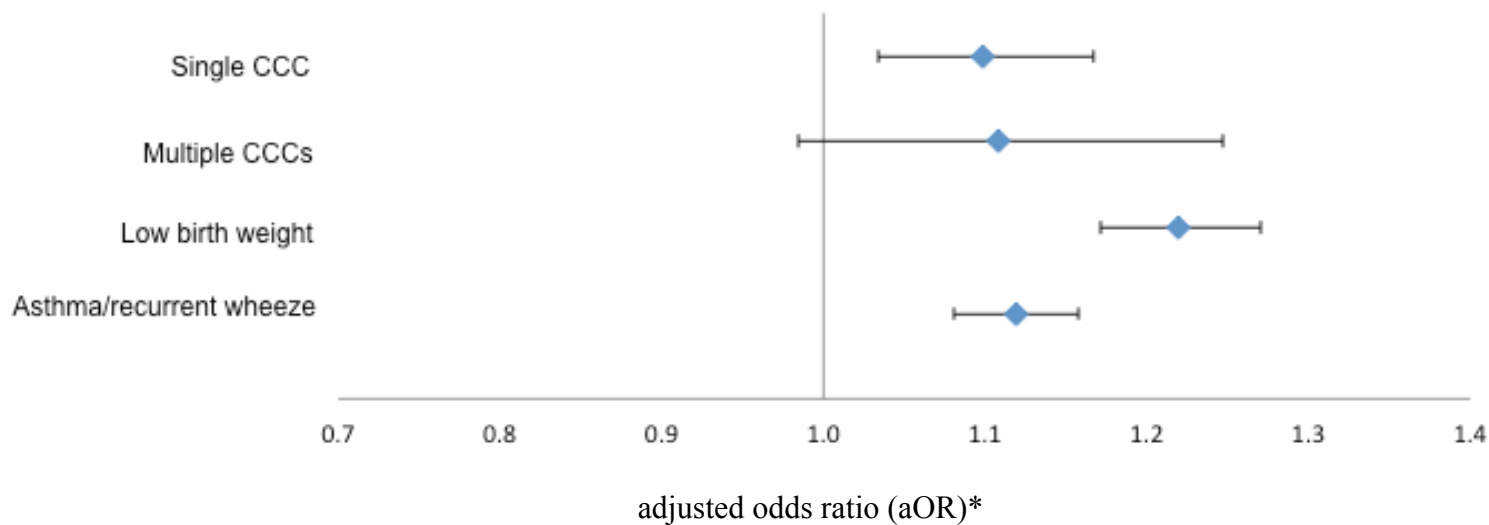

\*adjusted for gender, birth income quintile, and rurality; CCC=complex chronic condition.

Supplement: MOESM2 [file 9551048]
